# Supplementary material for: Contribution of polytetrafluoroethylene to the atmosphere-dependent synthesis of Cu-based nanomaterials through ion–dipole interactions
Source: Royal Society of Chemistry journal article supplement (doi:10.1039/c4ra09682g), 2014-10-15
Supplement: c4ra09682g1.pdf [file c4ra09682g1.pdf]

# Supporting Information

## Contribution of Polytetrafluoroethylene to Atmosphere-Dependent Synthesis of Cu-based Nanomaterials through Ion-Dipole Interactions

Li Zhao<sup>a</sup>, Le Xin Song<sup>\*a,b</sup>, Juan Xia<sup>\*b</sup>, Yue Teng<sup>b</sup> and Zheng Kun Yang<sup>c</sup> and Qing Shan Wang<sup>a</sup>

Received: 3th September 2014

<sup>a</sup>Department of Chemistry, University of Science and Technology of China, Jin Zhai Road 96, Hefei 230026, China

<sup>b</sup>CAS Key Laboratory of Materials for Energy Conversion, Department of Materials Science and Engineering, University of Science and Technology of China, Jin Zhai Road 96, Hefei 230026, China

<sup>c</sup>Division of Nanomaterials and Chemistry Hefei National Laboratory for Physical Sciences at Microscale, Jin Zhai Road 96, Hefei 230026, China

[solexin@ustc.edu.cn](mailto:solexin@ustc.edu.cn)

[xiajuan@mail.ustc.edu.cn](mailto:xiajuan@mail.ustc.edu.cn)

### A list of the contents for all the supporting information

| Page | Contents                                                                                                                                                                                                                                                                                                   |
|------|------------------------------------------------------------------------------------------------------------------------------------------------------------------------------------------------------------------------------------------------------------------------------------------------------------|
| 1    | A table of contents page.                                                                                                                                                                                                                                                                                  |
| 2    | <b>Fig. S1</b> TG (A) and DTG (B) profiles of PTFE in nitrogen.                                                                                                                                                                                                                                            |
| 3    | <b>Fig. S2</b> XRD patterns of CuCl <sub>2</sub> @Cu <sub>2</sub> OCl <sub>2</sub> (a), the mixture of CuO and PTFE (b), CuO (c) and CuO (d) obtained by sintering the CuCl <sub>2</sub> at 673 K, PTFE/CuCl <sub>2</sub> at 673 K, CuCl <sub>2</sub> at 873 K and PTFE/CuCl <sub>2</sub> at 873 K in air. |
| 4    | <b>Fig. S3</b> FTIR spectra of PTFE (a) and PTFE/CuCl <sub>2</sub> (b).                                                                                                                                                                                                                                    |
| 5    | <b>Fig. S4</b> XPS-(Cu <sub>2p</sub> ) spectra of CuCl <sub>2</sub> (a) and PTFE/CuCl <sub>2</sub> (b).                                                                                                                                                                                                    |
| 6    | <b>Fig. S5</b> XRD patterns of CuO (a) and CuO (b) obtained by sintering the PVC/CUC at 673 and 873 K for 2 h in air.                                                                                                                                                                                      |
| 7    | <b>Fig. S6</b> XRD patterns of CuCl@CuO (a) and CuO (b) obtained by sintering the β-CD/CUC at 673 and 873 K for 2 h in air.                                                                                                                                                                                |
| 8    | <b>Fig. S7</b> TIC curves of PTFE (a), PTFE/CuCl <sub>2</sub> (b) and PTFE/CUC (c).                                                                                                                                                                                                                        |
| 9    | <b>Fig. S8</b> Mass spectra of PTFE (a), PTFE/CuCl <sub>2</sub> (b) and PTFE/CUC (c) at 35.8 min.                                                                                                                                                                                                          |
| 10   | <b>Fig. S9</b> SERS spectra of R6G on the mixture of commercial Cu and commercial CuCl (a) and the commercial Cu (b).                                                                                                                                                                                      |

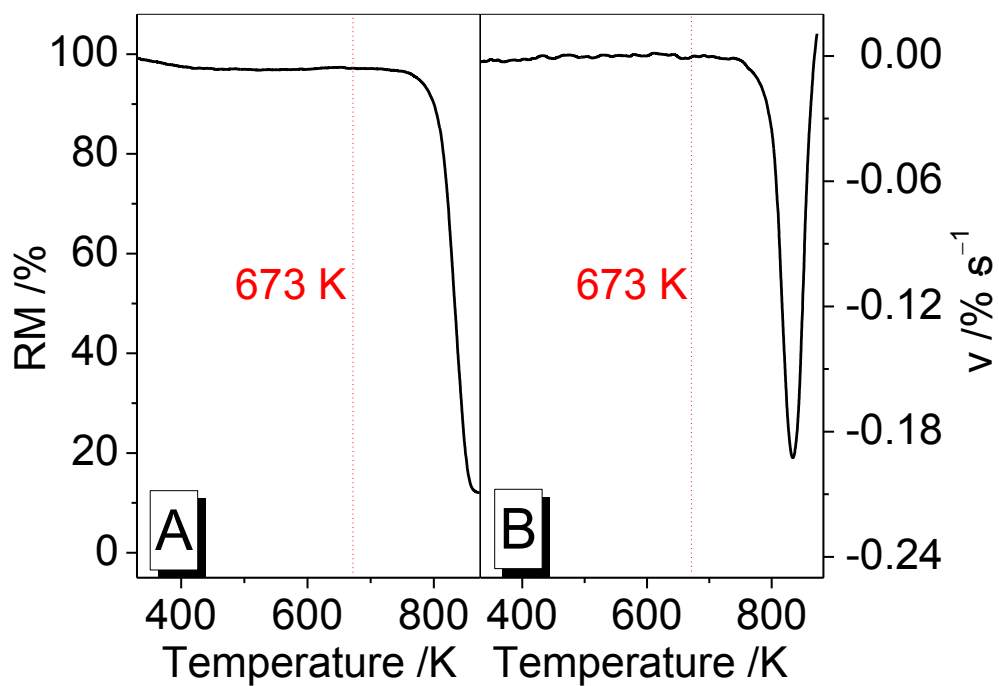

**Fig. S1** TG (A) and DTG (B) profiles of PTFE in nitrogen.

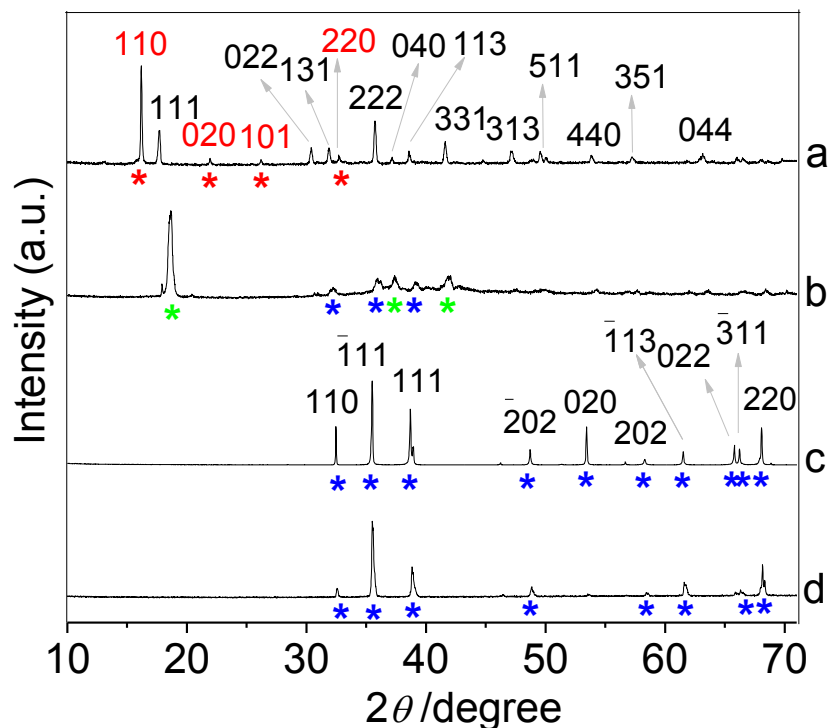

**Fig. S2** XRD patterns of  $\text{CuCl}_2@ \text{Cu}_2\text{OCl}_2$  (a), the mixture of CuO and PTFE (b), CuO (c) and CuO (d) obtained by sintering the  $\text{CuCl}_2$  at 673 K, PTFE/ $\text{CuCl}_2$  at 673 K,  $\text{CuCl}_2$  at 873 K and PTFE/ $\text{CuCl}_2$  at 873 K in air, respectively. Diffraction peaks due to  $\text{CuCl}_2$ , CuO and PTFE were shown by red, blue and green asterisks, respectively.

The decomposition process of free  $\text{CuCl}_2$  can be described by Equations 1~3:

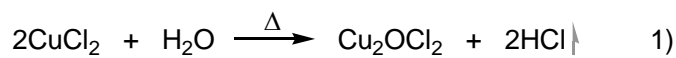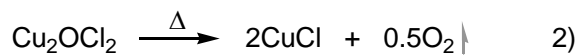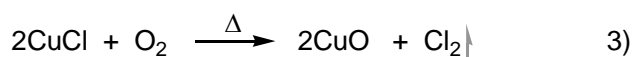

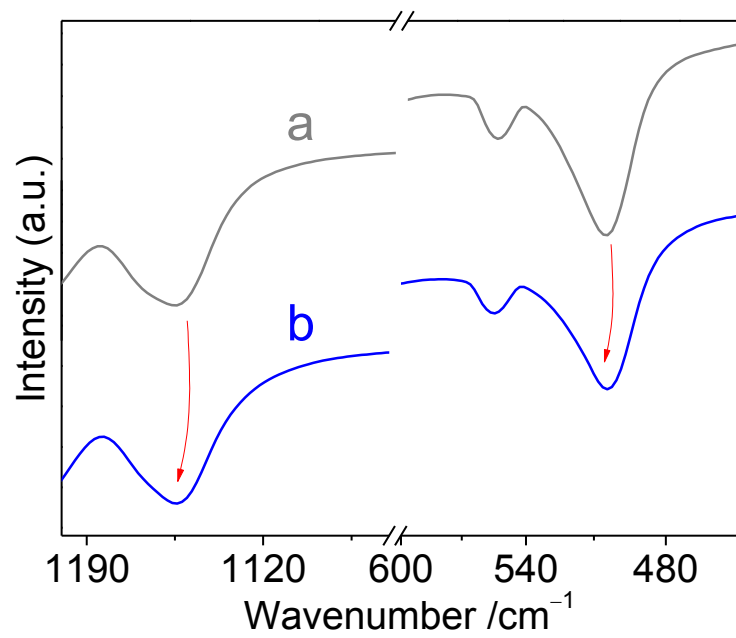

**Fig. S3** FTIR spectra of PTFE (a) and PTFE/CuCl<sub>2</sub> (b).

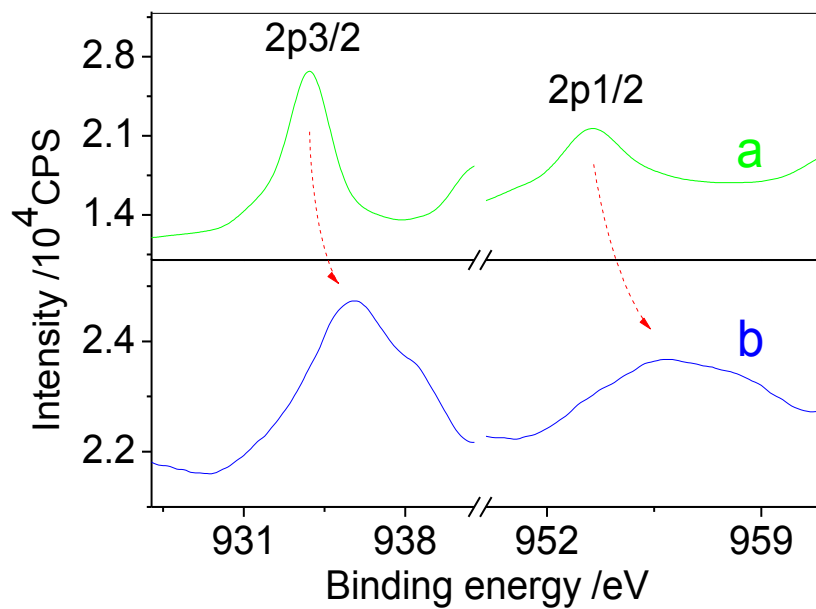

**Fig. S4** XPS-(Cu<sub>2p</sub>) spectra of CuCl<sub>2</sub> (a) and PTFE/CuCl<sub>2</sub> (b).

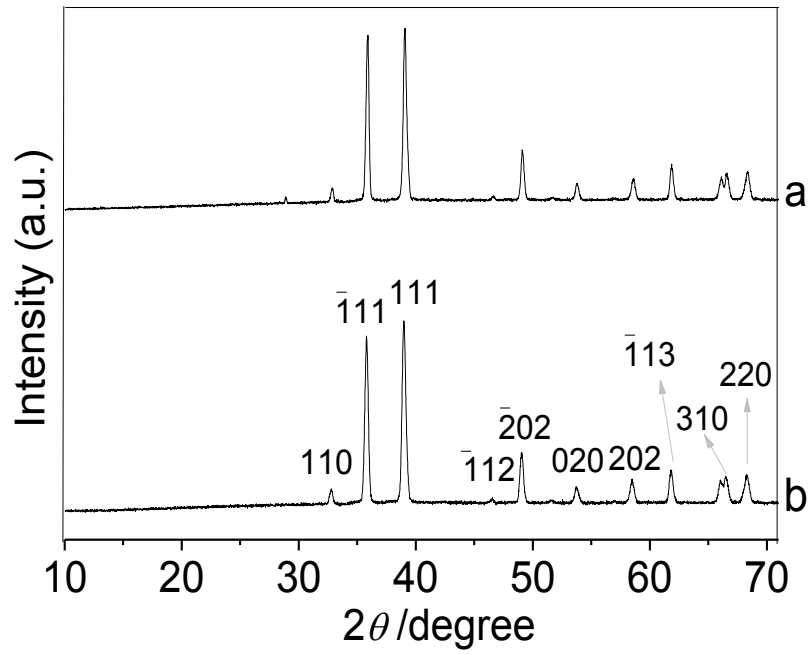

**Fig. S5** XRD patterns of CuO (a) and CuO (b) obtained by sintering the PVC/CUC at 673 and 873 K for 2 h in air, respectively.

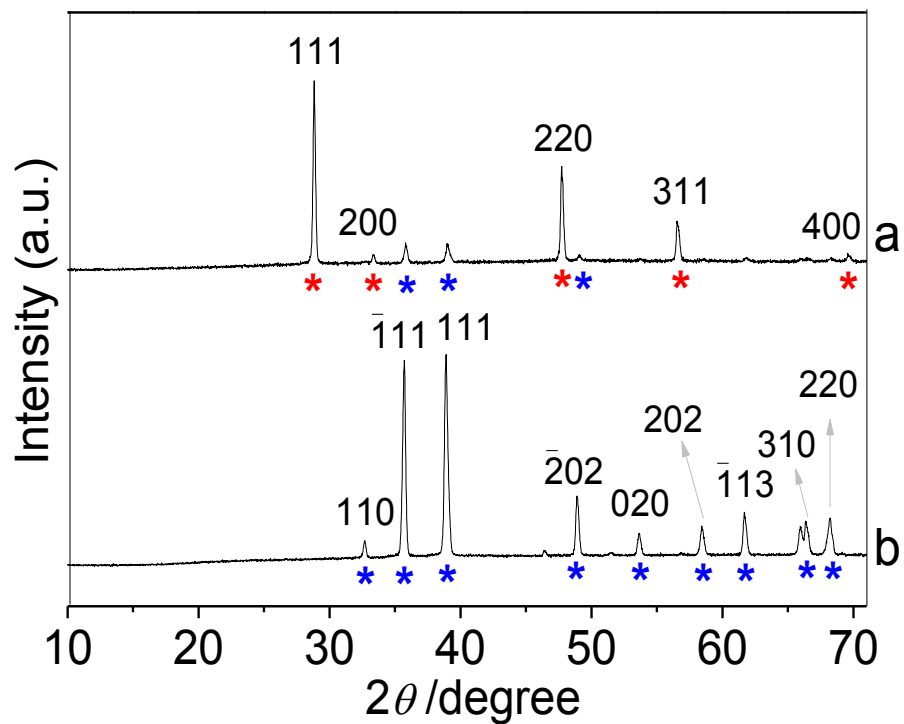

**Fig. S6** XRD patterns of CuCl@CuO (a) and CuO (b) obtained by sintering the  $\beta$ -CD/CUC at 673 and 873 K for 2 h in air. Diffraction peaks due to CuCl and CuO were shown by red and blue asterisks, respectively.

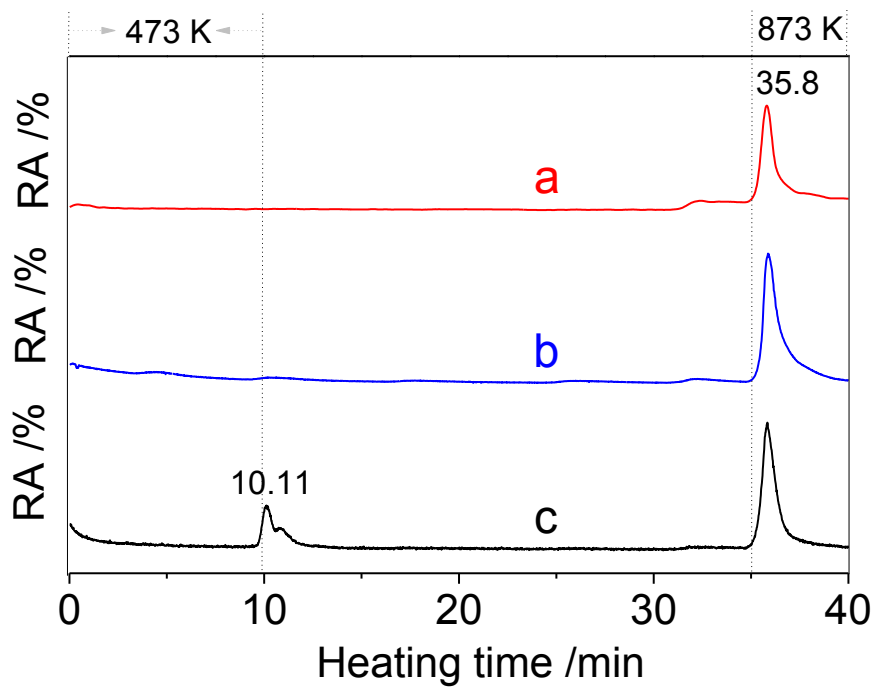

**Fig. S7** TIC curves of PTFE (a), PTFE/CuCl<sub>2</sub> (b) and PTFE/CUC (c).



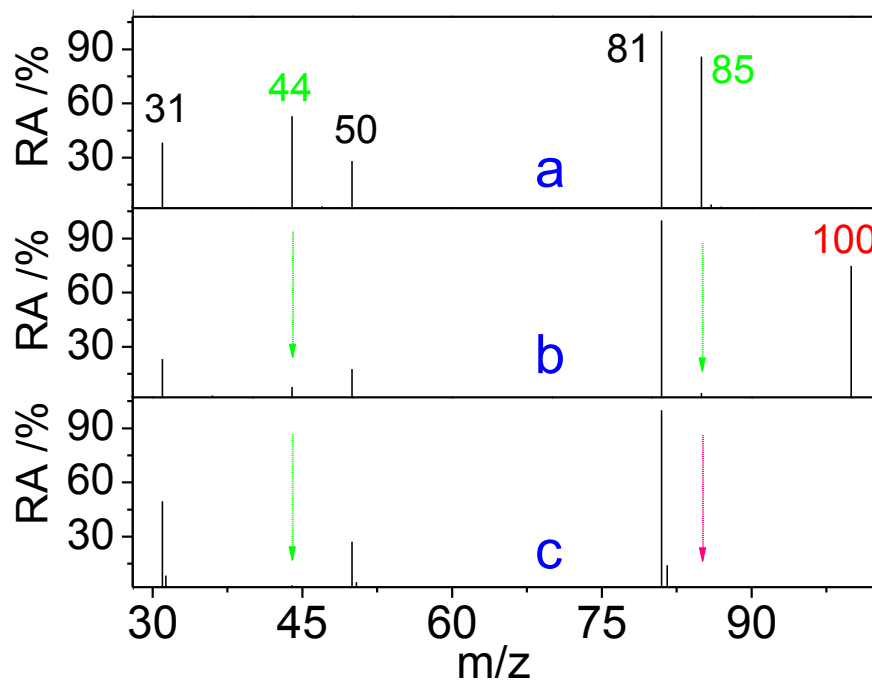

**Fig. S8** Mass spectra of PTFE (a), PTFE/CuCl<sub>2</sub> (b) and PTFE/CUC (c) at 35.8 min.

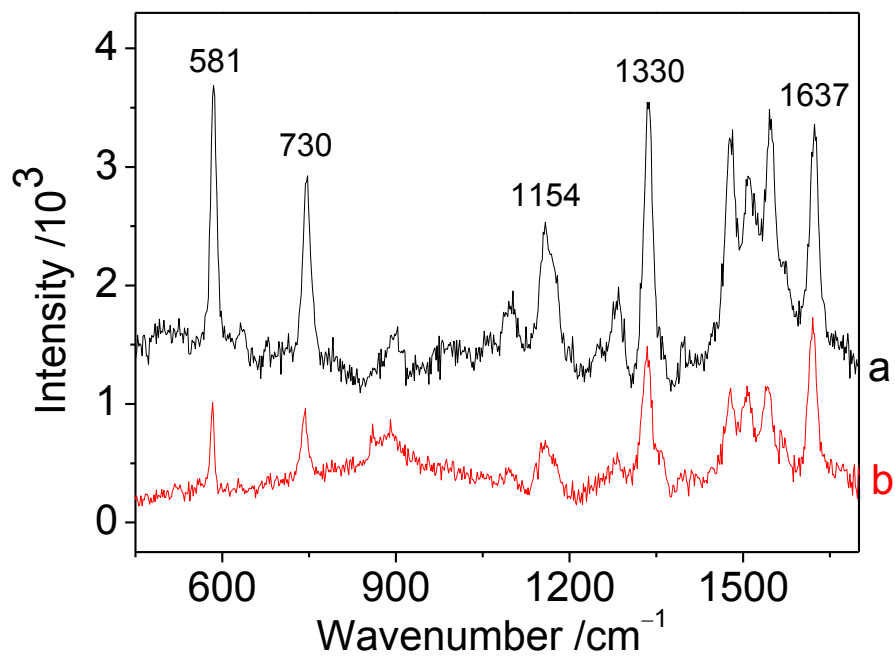

**Fig. S9** SERS spectra of R6G on the mixture of commercial Cu and commercial CuCl (a), the commercial Cu (b). Experimental conditions are as follows:  $\lambda_{\text{exc}} = 514.5$  nm, power = 2.5 mW, integration time = 10 s.
